# Supplementary material for: Linking electronic mental healthcare and benefits records in South London: design, procedure and descriptive outcomes
Source: PubMed Central journal article supplement (PMC9950921; doi:10.1136/bmjopen-2022-067136), 2023-02-14
Supplement: bmjopen-2022-067136supp001.pdf [file bmjopen-2022-067136supp001.pdf]

## Supplementary Material

### Data access

The DWP administrative data and CRIS clinical data are stored and hosted by the SLaM Clinical Data Linkage Service (CDLS). Researchers wishing to explore the DWP-CRIS data will first need to submit a project proposal to the CRIS Oversight Committee. The CRIS Oversight Committee will assess whether the application adherences to the agreed standards of research and dissemination specifically outlined for the CRIS database. Once approved, the application will be directed to the Work and Health Screening Panel, specifically set up to consider applications to explore the linked DWP-CRIS data. This panel is made up of a representative from the DWP and a member of the CRIS Oversight Committee. The decision to grant or deny approval for the application to access and use the linked data will be informed by the governance and ethical approvals obtained and implemented as part of the established linkage. These include: 1) NHS Health Research Authority Research Ethics Committee approval, 2) Section 251 approval under the NHS Health Research Authority Confidential Advisory Group, 3) SLaM Caldicott Guardian, 4) DWP governance panels and 5) DWP/CRIS data sharing agreement. In addition, all projects are required to have a local collaborator from King's Health Partners (e.g. SLaM, King's College London, King's College Hospital or Guy's and St Thomas' NHS Foundation Trust).

All approved projects are published with the proposal title, lay summary and lead researcher details on the public facing Maudsley BRC website (<https://www.maudsleybrc.nihr.ac.uk/facilities/clinical-record-interactive-search-cris/cris-data-linkages>). All research papers will be published in the CRIS publications section of the BRC website (<https://www.maudsleybrc.nihr.ac.uk/facilities/clinical-record-interactive-search-cris/cris-publications/>).

Once the Work and Health Screening Panel has approved the application, the applicant will work with the SLaM Clinical Data Linkage Service to develop a project data extraction specification, only including the data that is needed to answer the specific research questions as outlined in the project application. The analysis of specific extracts of the linked data will be carried out within the SLaM firewall by the applicant on site, or via a secure VPN connection. Only those who hold a contract with SLaM (substantive or honorary), or a research passport, will be able to submit a project application and work with the linked data once approved.

Supplementary Table 1: Overview of types of benefits received among linked patients (n=183,821).

| Type of benefit <sup>μ</sup>                          | N (%)        |
|-------------------------------------------------------|--------------|
| Employment and Support Allowance (ESA)                | 82436 (44.9) |
| Jobseeker's Allowance (JSA)                           | 75524 (41.1) |
| Income Support (IS)                                   | 59748 (32.5) |
| Disability Living Allowance (DLA)                     | 52675 (28.7) |
| Incapacity Benefit (IB)                               | 50520 (27.5) |
| Retirement / State Pension (RP)                       | 49040 (26.7) |
| Personal Independence Payment (PIP)                   | 47315 (25.7) |
| Universal Credit (UC)                                 | 46789 (25.4) |
| UC conditionality regime – Searching for work         | 38073 (81.4) |
| UC conditionality regime – Working, with requirements | 13448 (28.7) |
| UC conditionality regime – No work requirements       | 16505 (35.3) |
| UC conditionality regime – Working, no requirements   | 13610 (29.1) |
| UC conditionality regime – Preparing for work         | 4497 (9.6)   |
| UC conditionality regime – Planning for work          | 2402 (5.1)   |
| Attendance Allowance (AA)                             | 25017 (13.6) |
| Pension Credit (PC)                                   | 22749 (12.4) |
| Carer's Allowance (ICA)                               | 13798 (7.5)  |
| Severe Disablement Allowance (SDA)                    | 3682 (2.0)   |
| Passported Incapacity Benefit (PIB)                   | 1622 (0.9)   |
| Bereavement Benefit (BB)                              | 732 (0.4)    |
| Widows Benefit (WB)                                   | 326 (0.2)    |

<sup>μ</sup> benefit received between 1<sup>st</sup> of January 2005 and 30<sup>th</sup> of June 2020. – PIP was only introduced in April 2013 to replace DLA. UC was only introduced in 2013. SDA was replaced by IB in April 2001. IB was replaced by ESA and since January 2011 no new IB claims have been accepted. % will not add up to 100% as patients could have received multiple benefits over time.

Supplementary Table 2: Overview of patients who had a recorded primary psychiatric diagnosis and had ever a benefit entry for benefits not directly related to unemployment, sickness, disability, Income Support or Universal Credit.

| <b>Benefit type</b>                                                                                            | <b>Retirement / State Pension (RP) N (%)</b><br>n=22605 | <b>Pension Credit (PC) N (%)</b><br>n=18358 | <b>Attendance Allowance (AA) N (%)</b><br>n=20870 | <b>Widow's Benefit (WB) N (%)</b><br>n=224 | <b>Bereavement Benefit (BB) N (%)</b><br>n=502 | <b>Carer's Allowance (ICA) N (%)</b><br>n=9298 | <b>Passported Incapacity Benefit (PIB) N (%)</b><br>n=1194 |
|----------------------------------------------------------------------------------------------------------------|---------------------------------------------------------|---------------------------------------------|---------------------------------------------------|--------------------------------------------|------------------------------------------------|------------------------------------------------|------------------------------------------------------------|
| <b>Recorded primary psychiatric diagnoses (ICD-10 code and description) ∞</b>                                  |                                                         |                                             |                                                   |                                            |                                                |                                                |                                                            |
| F00-F09 (Mental and behavioural disorders, and mental disorders due to known physiological conditions) n=26069 | 22605 (86.7)                                            | 9827 (37.7)                                 | 15503 (59.5)                                      | 73 (0.3)                                   | 44 (0.2)                                       | 1146 (4.4)                                     | 32 (0.1)                                                   |
| F10-F19 (Mental and behavioural disorders due to psychoactive substance use) n=23713                           | 1879 (7.9)                                              | 1118 (4.7)                                  | 413 (1.7)                                         | 19 (0.1)                                   | 68 (0.3)                                       | 2002 (8.4)                                     | 89 (0.4)                                                   |
| F20-F29 (Schizophrenia, schizotypal, delusional disorders and other non-mood psychotic disorders) n=14944      | 2732 (18.3)                                             | 2042 (13.7)                                 | 715 (4.8)                                         | 19 (0.1)                                   | 39 (0.3)                                       | 520 (3.5)                                      | 183 (1.2)                                                  |
| F30-F39 (Mood (affective) disorders) n=27046                                                                   | 6502 (24.0)                                             | 2996 (11.1)                                 | 2532 (9.4)                                        | 58 (0.2)                                   | 178 (0.7)                                      | 2426 (9.0)                                     | 122 (0.5)                                                  |
| F40-F48 (Anxiety, dissociative, stress-related, somatoform and other nonpsychotic mental disorders) n=20432    | 4128 (20.2)                                             | 1765 (8.6)                                  | 1567 (7.7)                                        | 46 (0.2)                                   | 134 (0.7)                                      | 1787 (8.8)                                     | 197 (1.0)                                                  |

|                                                                                                                |           |            |          |           |           |            |           |
|----------------------------------------------------------------------------------------------------------------|-----------|------------|----------|-----------|-----------|------------|-----------|
| F50-F59 (Behavioural syndromes associated with physiological disturbances and physical factors) n=3840         | 226 (5.9) | 64 (1.7)   | 40 (1.0) | <5 (<1.0) | 18 (0.5)  | 276 (7.2)  | 50 (1.3)  |
| F60-F69 (Disorders of adult personality and behaviour) n=5495                                                  | 316 (5.8) | 205 (3.7)  | 64 (1.2) | <5 (<1.0) | 12 (0.2)  | 437 (8.0)  | 77 (1.4)  |
| F70-F79 (Intellectual disabilities) n=2448                                                                     | 233 (9.5) | 299 (12.2) | 26 (1.1) | <5 (<1.0) | <5 (<1.0) | 41 (1.7)   | 232 (9.5) |
| F80-F89 (Pervasive and specific developmental disorders) n=2623                                                | 39 (1.5)  | 20 (0.8)   | 5 (0.2)  | <5 (<1.0) | <5 (<1.0) | 145 (5.5)  | 116 (4.4) |
| F90-F98 (Behavioural and emotional disorders with onset usually occurring in childhood and adolescence) n=5092 | 59 (1.2)  | 22 (0.4)   | 5 (0.1)  | <5 (<1.0) | 6 (0.1)   | 518 (10.2) | 96 (1.9)  |

*∞ latest psychiatric primary diagnosis recorded closest and before window end date (30 June 2019) based on ICD-10 F codes only (mental and behavioural disorders) but excluding non-specific diagnoses, e.g. Z\*, F99\*, FXX.  $\mu$  any type of benefits received between 1<sup>st</sup> of January 2005 and 30<sup>th</sup> of June 2020. Cell sizes with less than <5 observations are shown as <5 (<1.0%).*

Supplementary Table 3: Overview of patients who had a recorded primary psychiatric diagnosis and had received Universal Credit, by Universal Credit conditionality regime.

| Benefit type                                                                                                 | UC Conditionality regime – searching for work (AA)<br>N (%)<br>n=25012 | UC Conditionality regime – working, with requirements (AB)<br>N (%)<br>n=8409 | UC Conditionality regime – no work requirements (BC)<br>N (%)<br>n=11404 | UC Conditionality regime – working, no requirements (BD)<br>N (%)<br>n=8450 | UC Conditionality regime – preparing for work (CE)<br>N (%)<br>n=2991 | UC Conditionality regime – planning for work (DF)<br>N (%)<br>n=1488 |
|--------------------------------------------------------------------------------------------------------------|------------------------------------------------------------------------|-------------------------------------------------------------------------------|--------------------------------------------------------------------------|-----------------------------------------------------------------------------|-----------------------------------------------------------------------|----------------------------------------------------------------------|
| Recorded primary psychiatric diagnoses (ICD-10 code and description) ∞                                       |                                                                        |                                                                               |                                                                          |                                                                             |                                                                       |                                                                      |
| F00-F09 (Mental and behavioural disorders, and mental disorders due to known physiological conditions) n=513 | 415 (80.9)                                                             | 129 (25.2)                                                                    | 240 (46.8)                                                               | 117 (22.8)                                                                  | 36 (7.0)                                                              | 6 (1.2)                                                              |
| F10-F19 (Mental and behavioural disorders due to psychoactive substance use) n=8547                          | 7605 (88.7)                                                            | 1911 (22.3)                                                                   | 2524 (29.4)                                                              | 1809 (21.1)                                                                 | 807 (9.4)                                                             | 185 (2.2)                                                            |
| F20-F29 (Schizophrenia, schizotypal, delusional disorders and other non-mood psychotic disorders) n=2989     | 2467 (85.1)                                                            | 762 (26.3)                                                                    | 1427 (49.2)                                                              | 638 (22.0)                                                                  | 113 (3.9)                                                             | 52 (1.8)                                                             |
| F30-F39 (Mood (affective) disorders) n=7044                                                                  | 5437 (77.2)                                                            | 2212 (31.4)                                                                   | 2814 (40.0)                                                              | 2322 (33.0)                                                                 | 866 (12.3)                                                            | 553 (7.9)                                                            |
| F40-F48 (Anxiety, dissociative, stress-related, somatoform and                                               | 4197 (77.0)                                                            | 1744 (32.0)                                                                   | 2003 (36.8)                                                              | 1805 (33.1)                                                                 | 650 (11.9)                                                            | 364 (6.7)                                                            |

|                                                                                                                |             |            |            |            |           |           |
|----------------------------------------------------------------------------------------------------------------|-------------|------------|------------|------------|-----------|-----------|
| other nonpsychotic mental disorders) n=5451                                                                    |             |            |            |            |           |           |
| F50-F59 (Behavioural syndromes associated with physiological disturbances and physical factors) n=1168         | 831 (71.2)  | 332 (28.4) | 346 (29.6) | 484 (41.4) | 110 (9.4) | 95 (8.1)  |
| F60-F69 (Disorders of adult personality and behaviour) n=1874                                                  | 1500 (80.0) | 448 (26.0) | 934 (49.8) | 494 (26.4) | 180 (9.6) | 94 (5.0)  |
| F70-F79 (Intellectual disabilities) n=238                                                                      | 195 (81.9)  | 32 (13.5)  | 143 (60.1) | 18 (7.6)   | 20 (8.4)  | 5 (2.1)   |
| F80-F89 (Pervasive and specific developmental disorders) n=653                                                 | 551 (84.4)  | 158 (24.2) | 285 (43.6) | 111 (17.0) | 53 (8.1)  | 17 (2.6)  |
| F90-F98 (Behavioural and emotional disorders with onset usually occurring in childhood and adolescence) n=2209 | 1814 (82.1) | 641 (29.0) | 688 (31.2) | 652 (29.5) | 156 (7.1) | 117 (5.3) |

*∞ latest psychiatric primary diagnosis recorded closest and before window end date (30 June 2019) based on ICD 10 F codes only (mental and behavioural disorders) but excluding non-specific diagnoses, e.g. Z\*, F99\*, FXX.  $\mu$  any type of benefits received between 1<sup>st</sup> of January 2005 and 30<sup>th</sup> of June 2020.*
